# Supplementary material
Source: publisher figshare collection journal article supplement (https://gsajournals.figshare.com/ndownloader/files/14162810)
Supplement: Supplementary file 1 [file 14162810]

## Sheet: Sheet1
Oligonucleotide name	sequence 5' -> 3'
mf76_leftP	TCGACTGCTCTCTTCATCCC
mf76_rightP	GGTCGGGGTTTCGGGATATC
mf78_400bp_VPF	CAGTACCCAGCTCTGTGCAA
mf78_400bp_VPR	ACTGAGTGTCACATCAGTTC
mf78_EcoRVw_130-F	GCTGTCTCTAAACAGGACGATA
mf78_EcoRVw_130-R	CACATTAACATCCGTTCCAG
mf86-EboxA_124-F	TCTCCCTTTAGAACGATACCC
mf86-EboxA_124-R	CGAATTGGGGGTAGTACAGTA
mf86-F	GGAGCTCTATATTGCGCCC
mf86-R	TGTAGCATTTCTTCGAGGGC
sy465-F	GCGACAATCCAATACTTTCAGC
sy465-R	GGCCATACTGGCTTCCTCCTGGTTTT
Oti-plx-14K-F	CTGAAAGACCGTCTGCTTCC
Oti-plx-12K-F	GAGGCCGAATATGGTCTTCA
Oti-plx-7K-R	ATCTGGAAACTGACCTT
Oti-plx-13K-R	AAGGAGCGAAAGTGTAG
Oti-plx-6K-R	GGCATGCCTTCTATGGTTGT
Oti-plx-15K-R	AGAAGAAGTTTTGTTTAGAT
Oti-plx-3K-F	TGCTTCATTTGCGATCAAAG
Oti-plx-15K-F	GGTATAACCGATCCGAGG
Oti-plx-2K-R	CCTATATTAGAAGGTTCCCA
Oti-plx-10K-R	TCAGAACTTTTCTGGCAGTC
Oti-plx-8K-R	TGGCCAGACAAGTTCCACAG
Oti-plx-3K-R	AAGTAGAGCCGGTAATCGGA
Oti-plx-5K-R	TCATCATCGGATCTTAGCAA
Oti-plx-1K-R	AAAGACTCGCATTTGCACTC
Oti-plx-10K-F	GCCGCTCAAGTGTTCTTTTC
Oti-plx-11K-F	ATACCCTTGCGACTGGTGTC
Oti-plx-5K-F	CACTGGCTCTTTAGGGCTTG
Oti-plx-9K-F	ACTTTGCGACTAGGCAGGGA
Oti-plx-1K-F	TGTGTCGCGAGTCAATTCTC
Oti-plx-7K-F	AGTCTGCGCAAGAATCCCTA
Oti-plx-9K-R	CGGTAAAACCTACGTTCAAT
Oti-plx-2K-F	CGGCTTCAACCACACCTATT
Oti-plx-14K-R	ATTCATTCGCCTCGAGGGCT
Oti-plx-11K-R	GCAAAGGCTTCTTTGCATTC
Oti-plx-12K-R	GAAGTCACCATTTTATGAGA
Oti-plx-6K-R	GACGAAAATTCGCTTGGTCG
Oti-plx-8K-F	TCTGCGCAAGAATCCCTACT
Oti-plx-4K-R	GCGGACATCATATTACATCC
Oti-plx-4K-F	AACGAGTGGTTGTGGGTCTC
Oti-plx-13K-R	GACTAGTGCCCGCCGACCAT
Oti-egl-20-i2K-R	AGCCTCCCCAGGAGAATTGG
Oti-egl-20-i1K-R	TTTTTTATGTGCTCGGCGCC
Oti-egl-20-i3K-R	AAAAGTCGTTTGAGGAAATC
Oti-egl-20-i2K-F	TCCCTCCTCCTTTTCGTTCT
Oti-egl-20-3K-R	CCTATTGAATTTCGTCAAAT
Oti-egl-20-i3K-F	GAATGCGGCTGTGACAGTAA
Oti-egl-20-3K-F	CGCACCAACCATGATAGTG
Oti-dpy-6-VP-124-R	GGAAAAACATAAATTTTACC
Oti-dpy-6-VP-124-F	GATCCGAGGTGGACAAAGAA
mf78-400-VP-F	CAGTACCCAGCTCTGTGCAA
mf78-400-VP-R	ACTGAGTGTCACATCAGTTC
Oti-dpy-6_544_F	GACTGGTGACCCCCAAGTAG
Oti-dpy-6_544_R	ATTCTTGACATGACTTGCCA
Cel-plx-1_111-F	CGTGTCTGTACTGGGGATAAGAA
Cel-plx-1_111-R	GGCACGTGTGACATATACATCT
Cel-plx-1_360-F	TGTAACTCGGCAACGTGTCA
Cel-plx-1_360-R	GCCGATACGGGGGTCATTTT
plx-2_Fwd	CAGTTCGCCCATCTCCAACT
plx-2_WT-434_Rev	CCCCTCGACGAAGATAGCTG
plx-2_ev773-169_Rev	GGACCTCCAAAAGGCTACGG
plx-1_Fwd	AGGGGCTCACAGGAGAGAAT
plx-1_WT-714_Rev	GGGGTTCTGAGAGGGTTTCG
plx-1_ev724-284_Rev	TTTCAAACTGGGTCATTTTTCAGA
